# Supplementary material
Source: Copernicus journal article supplement (doi:10.5194/ejm-38-353-2026)
Supplement: Supplementary file 1 [file ejm-38-353-2026-supplement.pdf]

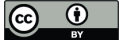

*Supplement of*

## **Dehydration reactions in guano-derived minerals: the taranakite-to-francoanellite transformation**

**Yuri Galliano et al.**

*Correspondence to:* Yuri Galliano ([yuri.galliano@edu.unige.it](mailto:yuri.galliano@edu.unige.it))

The copyright of individual parts of the supplement might differ from the article licence.

## S1. Further details on spectral fitting and data evaluation

The Origin-Pro 2021 software was used for fitting and data evaluation. Each spectrum was baseline-corrected to account for the eventual luminescence background. The Raman scattering intensity  $I$  was temperature-reduced according to the Bose-Einstein phonon population factor  $n(\omega, T)$  (e.g., Kuzmany, 2009):  $I_{reduced} = I_{measured} / [n(\omega, T) + 1]$  where  $n(\omega, T) =$   
5  $(e^{\hbar\omega/k_B T} - 1)^{-1}$ , and  $\hbar$ ,  $k_B$ ,  $\omega$ , and  $T$  are the reduced Planck's constant, Boltzmann's constant, phonon angular frequency (in  $s^{-1}$ ) and temperature (in K), respectively. A pseudo-Voigt function ( $PV = qL + (1 - q)G$ , where  $L$  and  $G$  are the Lorentz and Gauss peak-shape functions, respectively, and  $q$  is a weight coefficient) was used to obtain the position, full-width at half maximum and integrated intensity of the Raman peaks.

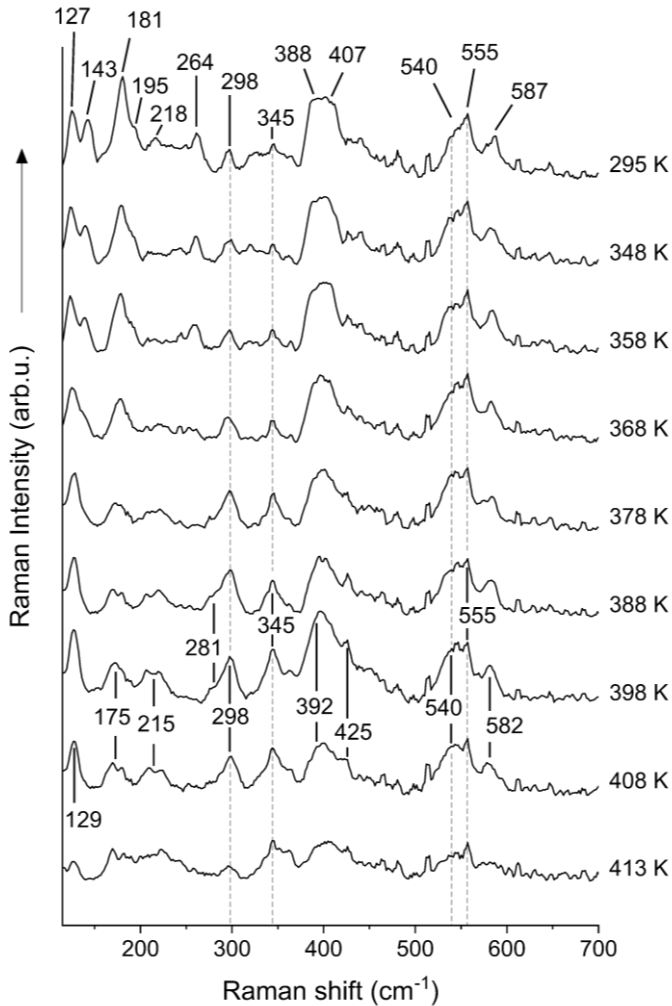

10 **Figure S1.** Selected Raman spectra collected in situ at increasing temperatures, displaying the external lattice modes and the phosphate bending modes in the range 100–700  $cm^{-1}$ .

## S2. Comment to Figure S1

In the range 100–700  $\text{cm}^{-1}$  (**Fig. S1**), at T between 348 and 398 K, the spectra are subject to significant changes in intensity and band position of the lattice modes and phosphate bending modes. In these spectra, collected at HT conditions, only the most intense peaks are visible due to hampering of the Raman scattering intensity of already weak peaks by the borosilicate cover of the HT-stage. The wavenumbers of the observable peaks are marked, showing correspondence with the peak positions from the spectra of taranakite and francoanellite collected at room temperature without the HT-stage (see **Fig. 6a** and **Fig. 6c** in the manuscript). Between 295 K and 388 K, the taranakite Raman peaks near to 143 and 264  $\text{cm}^{-1}$  greatly decrease in intensity and are not observed at higher T. The taranakite Raman peaks near to 298, 345, 540 and 555  $\text{cm}^{-1}$  do not display significant changes in peak positions, and show an overall modest increase in intensity up to 398 K. At 398 K, the peaks are coincident with those of francoanellite as measured at ambient conditions, although the loss in intensity and overall resolution is noticeable for the reasons mentioned earlier. At T > 413 K, all peaks show a marked decrease in intensity and finally disappear at 478 K, pointing to the complete amorphisation of the material.

## S3. Supplementary data to Figure 7.

| francoanellite $\nu_1(\text{PO}_4)$ |                                    |                                                  |                              |                                         |                                  |                                             |
|-------------------------------------|------------------------------------|--------------------------------------------------|------------------------------|-----------------------------------------|----------------------------------|---------------------------------------------|
| T<br>(K)                            | Wavenumber<br>( $\text{cm}^{-1}$ ) | $\sigma$<br>(Wavenumber)<br>( $\text{cm}^{-1}$ ) | FWHM<br>( $\text{cm}^{-1}$ ) | $\sigma$ (FWHM)<br>( $\text{cm}^{-1}$ ) | Integrated<br>Intensity (arb.u.) | $\sigma$ (Integrated<br>Intensity) (arb.u.) |
| 358                                 | 930.848                            | 3.240                                            | 22.322                       | 3.251                                   | 46.823                           | 17.535                                      |
| 363                                 | 931.314                            | 1.400                                            | 13.150                       | 4.494                                   | 27.149                           | 13.887                                      |
| 368                                 | 933.259                            | 0.800                                            | 16.874                       | 1.382                                   | 88.405                           | 16.499                                      |
| 373                                 | 933.684                            | 0.486                                            | 16.929                       | 1.252                                   | 112.312                          | 16.904                                      |
| 378                                 | 933.358                            | 0.409                                            | 16.920                       | 0.886                                   | 158.154                          | 15.359                                      |
| 383                                 | 933.493                            | 0.289                                            | 16.869                       | 1.068                                   | 148.855                          | 15.251                                      |
| 388                                 | 933.330                            | 0.226                                            | 17.086                       | 1.095                                   | 174.019                          | 15.241                                      |
| 393                                 | 933.375                            | 0.259                                            | 18.614                       | 0.620                                   | 198.681                          | 10.269                                      |
| 398                                 | 933.490                            | 0.230                                            | 19.129                       | 0.659                                   | 238.885                          | 5.778                                       |
| 403                                 | 933.370                            | 0.255                                            | 19.575                       | 0.728                                   | 200.560                          | 5.121                                       |
| 408                                 | 932.758                            | 0.307                                            | 21.800                       | 0.885                                   | 207.140                          | 5.794                                       |

25 **Table S1.** Supplementary data to Fig.7 (in the main document). Raman data for francoanellite  $\nu_1(\text{PO}_4)$  peak. Collected under increasing temperature conditions.

**taranakite  $\nu_1(\text{PO}_4)$**

| <b>T<br/>(K)</b> | <b>Wavenumber<br/>(<math>\text{cm}^{-1}</math>)</b> | <b><math>\sigma</math><br/>(Wavenumber)<br/>(<math>\text{cm}^{-1}</math>)</b> | <b>FWHM<br/>(<math>\text{cm}^{-1}</math>)</b> | <b><math>\sigma</math> (FWHM)<br/>(<math>\text{cm}^{-1}</math>)</b> | <b>Integrated<br/>Intensity (arb.u.)</b> | <b><math>\sigma</math> (Integrated<br/>Intensity) (arb.u.)</b> |
|------------------|-----------------------------------------------------|-------------------------------------------------------------------------------|-----------------------------------------------|---------------------------------------------------------------------|------------------------------------------|----------------------------------------------------------------|
| 295              | 950.654                                             | 0.347                                                                         | 25.731                                        | 1.331                                                               | 174.666                                  | 13.201                                                         |
| 343              | 949.746                                             | 0.319                                                                         | 24.997                                        | 1.359                                                               | 201.055                                  | 14.455                                                         |
| 348              | 949.350                                             | 0.290                                                                         | 26.315                                        | 0.797                                                               | 226.810                                  | 4.951                                                          |
| 353              | 949.649                                             | 0.364                                                                         | 25.205                                        | 1.575                                                               | 184.916                                  | 20.539                                                         |
| 358              | 950.263                                             | 0.746                                                                         | 23.714                                        | 1.842                                                               | 166.630                                  | 16.474                                                         |
| 363              | 948.774                                             | 0.687                                                                         | 27.334                                        | 1.641                                                               | 206.730                                  | 13.823                                                         |
| 368              | 950.022                                             | 1.085                                                                         | 24.374                                        | 2.645                                                               | 140.994                                  | 18.666                                                         |
| 373              | 949.315                                             | 2.017                                                                         | 28.762                                        | 4.314                                                               | 98.357                                   | 21.318                                                         |
| 378              | 950.250                                             | 3.220                                                                         | 23.894                                        | 8.962                                                               | 46.004                                   | 20.455                                                         |
| 383              | 948.900                                             | 6.166                                                                         | 46.807                                        | 8.627                                                               | 58.101                                   | 19.223                                                         |
| 388              | 950.728                                             | 7.740                                                                         | 61.652                                        | 10.764                                                              | 53.115                                   | 17.902                                                         |

**Table S2.** Supplementary data to Fig.7 (in the main document). Raman data for taranakite  $\nu_1(\text{PO}_4)$  peak. Collected under increasing temperature conditions.

**S4. Supplementary data for HT-Raman analysis under isothermal conditions.**

**francoanellite  $\nu_1(\text{PO}_4)$  – 353 K**

| <b>time</b> | <b>Wavenumber<br/>(<math>\text{cm}^{-1}</math>)</b> | <b><math>\sigma</math><br/>(Wavenumber)<br/>(<math>\text{cm}^{-1}</math>)</b> | <b>FWHM<br/>(<math>\text{cm}^{-1}</math>)</b> | <b><math>\sigma</math> (FWHM)<br/>(<math>\text{cm}^{-1}</math>)</b> | <b>Integrated<br/>Intensity (arb.u.)</b> | <b><math>\sigma</math> (Integrated<br/>Intensity) (arb.u.)</b> |
|-------------|-----------------------------------------------------|-------------------------------------------------------------------------------|-----------------------------------------------|---------------------------------------------------------------------|------------------------------------------|----------------------------------------------------------------|
| 3           | <i>n.o.</i>                                         | <i>n.o.</i>                                                                   | <i>n.o.</i>                                   | <i>n.o.</i>                                                         | <i>n.o.</i>                              | <i>n.o.</i>                                                    |
| 8           | <i>n.o.</i>                                         | <i>n.o.</i>                                                                   | <i>n.o.</i>                                   | <i>n.o.</i>                                                         | <i>n.o.</i>                              | <i>n.o.</i>                                                    |
| 13          | <i>n.o.</i>                                         | <i>n.o.</i>                                                                   | <i>n.o.</i>                                   | <i>n.o.</i>                                                         | <i>n.o.</i>                              | <i>n.o.</i>                                                    |
| 18          | 935.906                                             | 4.448                                                                         | 22.885                                        | 8.046                                                               | 32.812                                   | 17.395                                                         |
| 23          | 933.893                                             | 1.450                                                                         | 14.817                                        | 3.872                                                               | 32.868                                   | 8.475                                                          |
| 28          | 934.659                                             | 1.377                                                                         | 14.822                                        | 3.460                                                               | 36.111                                   | 8.514                                                          |
| 33          | 934.604                                             | 1.378                                                                         | 16.375                                        | 3.459                                                               | 42.962                                   | 9.576                                                          |
| 38          | 934.053                                             | 0.927                                                                         | 14.060                                        | 2.472                                                               | 48.552                                   | 8.217                                                          |

|     |         |       |        |       |        |        |
|-----|---------|-------|--------|-------|--------|--------|
| 43  | 934.209 | 0.911 | 15.715 | 2.357 | 58.176 | 8.867  |
| 48  | 935.136 | 0.869 | 15.483 | 2.128 | 62.474 | 8.847  |
| 53  | 934.812 | 0.870 | 15.431 | 2.210 | 64.331 | 9.345  |
| 58  | 934.105 | 0.735 | 14.927 | 1.909 | 65.408 | 8.228  |
| 63  | 934.712 | 0.784 | 15.536 | 1.938 | 66.213 | 8.418  |
| 68  | 934.525 | 0.764 | 15.275 | 1.977 | 68.401 | 8.802  |
| 73  | 934.939 | 0.807 | 16.491 | 2.008 | 78.326 | 10.081 |
| 78  | 934.449 | 0.665 | 14.517 | 1.738 | 74.559 | 8.627  |
| 83  | 934.853 | 0.691 | 15.061 | 1.764 | 75.091 | 8.705  |
| 88  | 935.099 | 0.753 | 16.726 | 1.895 | 86.657 | 10.395 |
| 93  | 934.850 | 0.713 | 15.923 | 1.691 | 73.729 | 8.007  |
| 98  | 934.451 | 0.665 | 15.937 | 1.639 | 78.337 | 8.320  |
| 103 | 934.884 | 0.757 | 16.628 | 1.757 | 77.750 | 8.757  |
| 108 | 934.934 | 0.606 | 14.436 | 1.531 | 77.313 | 8.075  |
| 113 | 934.566 | 0.689 | 16.099 | 1.698 | 78.814 | 8.593  |
| 118 | 934.797 | 0.681 | 15.856 | 1.710 | 82.330 | 9.043  |
| 123 | 935.058 | 0.828 | 18.051 | 1.806 | 80.688 | 9.188  |
| 128 | 934.827 | 0.766 | 17.735 | 1.716 | 84.191 | 9.095  |
| 133 | 934.459 | 0.656 | 16.424 | 1.659 | 90.186 | 9.672  |
| 138 | 934.222 | 0.659 | 15.899 | 1.696 | 86.446 | 9.442  |

30 **Table S3.** Raman data for francoanellite  $\nu_1(\text{PO}_4)$  peak from time-resolved isothermal HT micro-Raman experiment at 353 K. Abbreviations: *n.o.* = not observed.

**taranakite  $\nu_1(\text{PO}_4)$  – 353 K**

| <b>time</b> | <b>Wavenumber<br/>(<math>\text{cm}^{-1}</math>)</b> | <b><math>\sigma</math><br/>(Wavenumber)<br/>(<math>\text{cm}^{-1}</math>)</b> | <b>FWHM<br/>(<math>\text{cm}^{-1}</math>)</b> | <b><math>\sigma</math> (FWHM)<br/>(<math>\text{cm}^{-1}</math>)</b> | <b>Integrated<br/>Intensity (arb.u.)</b> | <b><math>\sigma</math> (Integrated<br/>Intensity) (arb.u.)</b> |
|-------------|-----------------------------------------------------|-------------------------------------------------------------------------------|-----------------------------------------------|---------------------------------------------------------------------|------------------------------------------|----------------------------------------------------------------|
| 3           | 949.267                                             | 0.474                                                                         | 26.295                                        | 1.334                                                               | 180.871                                  | 6.308                                                          |
| 8           | 949.267                                             | *                                                                             | 28.544                                        | 1.390                                                               | 186.736                                  | 6.479                                                          |
| 13          | 949.267                                             | *                                                                             | 29.711                                        | 1.477                                                               | 192.163                                  | 6.750                                                          |
| 18          | 949.267                                             | *                                                                             | 27.631                                        | 2.374                                                               | 144.897                                  | 17.152                                                         |
| 23          | 949.267                                             | *                                                                             | 27.162                                        | 2.100                                                               | 143.699                                  | 11.074                                                         |

|     |         |   |        |       |         |        |
|-----|---------|---|--------|-------|---------|--------|
| 28  | 949.267 | * | 28.137 | 2.346 | 126.728 | 10.649 |
| 33  | 949.267 | * | 30.226 | 2.633 | 136.583 | 12.047 |
| 38  | 949.267 | * | 28.265 | 2.640 | 122.311 | 11.179 |
| 43  | 949.267 | * | 30.905 | 3.078 | 117.098 | 11.600 |
| 48  | 949.267 | * | 33.235 | 3.612 | 114.566 | 11.895 |
| 53  | 949.267 | * | 34.484 | 3.758 | 119.980 | 12.676 |
| 58  | 949.267 | * | 31.781 | 3.490 | 107.477 | 11.383 |
| 63  | 949.267 | * | 33.339 | 3.639 | 112.300 | 11.587 |
| 68  | 949.267 | * | 37.198 | 4.285 | 112.798 | 12.366 |
| 73  | 949.267 | * | 36.055 | 5.286 | 93.822  | 13.415 |
| 78  | 949.267 | * | 37.004 | 4.698 | 105.190 | 12.590 |
| 83  | 949.267 | * | 40.166 | 5.342 | 103.736 | 12.657 |
| 88  | 949.267 | * | 40.869 | 6.666 | 89.931  | 13.914 |
| 93  | 949.267 | * | 42.022 | 5.949 | 77.868  | 10.731 |
| 98  | 949.267 | * | 30.079 | 4.897 | 70.037  | 11.017 |
| 103 | 949.267 | * | 36.002 | 6.164 | 78.110  | 12.075 |
| 108 | 949.267 | * | 32.853 | 5.663 | 69.392  | 11.313 |
| 113 | 949.267 | * | 33.938 | 5.294 | 78.284  | 11.616 |
| 118 | 949.267 | * | 40.240 | 7.299 | 77.206  | 12.853 |
| 123 | 949.267 | * | 39.104 | 7.936 | 71.107  | 12.416 |
| 128 | 949.267 | * | 37.128 | 8.544 | 64.768  | 13.920 |
| 133 | 949.267 | * | 28.277 | 6.745 | 51.982  | 12.894 |
| 138 | 949.267 | * | 30.462 | 7.289 | 51.213  | 12.286 |

**Table S4.** Raman data for taranakite  $\nu_1(\text{PO}_4)$  peak from time-resolved isothermal HT micro-Raman experiment at 353 K. Abbreviations: *n.o.* = not observed.

**francoanellite  $\nu_1(\text{PO}_4)$  – 358 K**

| time | Wavenumber<br>( $\text{cm}^{-1}$ ) | $\sigma$<br>(Wavenumber)<br>( $\text{cm}^{-1}$ ) | FWHM<br>( $\text{cm}^{-1}$ ) | $\sigma$ (FWHM)<br>( $\text{cm}^{-1}$ ) | Integrated<br>Intensity (arb.u.) | $\sigma$ (Integrated<br>Intensity) (arb.u.) |
|------|------------------------------------|--------------------------------------------------|------------------------------|-----------------------------------------|----------------------------------|---------------------------------------------|
| 3    | <i>n.o.</i>                        | <i>n.o.</i>                                      | <i>n.o.</i>                  | <i>n.o.</i>                             | <i>n.o.</i>                      | <i>n.o.</i>                                 |
| 8    | 930.565                            | 5.786                                            | 32.587                       | 11.040                                  | 37.561                           | 16.071                                      |

|     |         |       |        |       |         |        |
|-----|---------|-------|--------|-------|---------|--------|
| 13  | 936.193 | 2.554 | 24.451 | 4.676 | 61.439  | 16.721 |
| 18  | 935.525 | 1.041 | 16.907 | 2.531 | 60.035  | 9.471  |
| 23  | 935.554 | 0.766 | 16.168 | 1.826 | 76.580  | 8.915  |
| 28  | 936.345 | 0.704 | 16.973 | 1.607 | 99.760  | 10.123 |
| 33  | 935.946 | 0.544 | 15.871 | 1.367 | 103.699 | 9.098  |
| 38  | 936.344 | 0.547 | 16.710 | 1.288 | 117.103 | 9.582  |
| 43  | 936.431 | 0.514 | 16.797 | 1.262 | 124.629 | 9.738  |
| 48  | 935.878 | 0.445 | 15.991 | 1.093 | 131.471 | 9.080  |
| 53  | 935.866 | 0.414 | 16.082 | 1.048 | 144.334 | 9.439  |
| 58  | 935.825 | 0.384 | 16.405 | 0.959 | 157.284 | 9.359  |
| 63  | 936.194 | 0.362 | 15.844 | 0.958 | 158.318 | 9.445  |
| 68  | 936.039 | 0.340 | 15.969 | 0.888 | 163.199 | 8.935  |
| 73  | 936.160 | 0.345 | 16.241 | 0.877 | 171.879 | 9.353  |
| 78  | 935.997 | 0.343 | 16.304 | 0.900 | 174.514 | 9.517  |
| 83  | 936.047 | 0.326 | 15.921 | 0.841 | 174.430 | 9.018  |
| 88  | 936.081 | 0.292 | 15.499 | 0.810 | 177.197 | 8.891  |
| 93  | 935.963 | 0.303 | 16.011 | 0.747 | 171.567 | 7.904  |
| 98  | 936.045 | 0.291 | 15.772 | 0.787 | 185.890 | 8.975  |
| 103 | 936.057 | 0.280 | 16.242 | 0.749 | 183.637 | 8.347  |
| 108 | 936.150 | 0.284 | 15.657 | 0.803 | 190.337 | 9.434  |
| 115 | 935.967 | 0.266 | 15.614 | 0.704 | 186.968 | 8.153  |
| 120 | 935.885 | 0.278 | 15.759 | 0.753 | 196.520 | 9.124  |
| 125 | 936.080 | 0.275 | 16.216 | 0.742 | 188.681 | 8.531  |
| 130 | 936.081 | 0.285 | 16.369 | 0.774 | 199.763 | 9.380  |
| 135 | 935.828 | 0.258 | 15.316 | 0.730 | 191.669 | 8.695  |
| 140 | 935.854 | 0.264 | 15.922 | 0.726 | 186.110 | 8.256  |
| 145 | 935.977 | 0.269 | 16.332 | 0.738 | 197.990 | 8.810  |
| 150 | 935.877 | 0.261 | 16.140 | 0.707 | 187.871 | 8.100  |

**Table S5.** Raman data for francoanellite  $\nu_1(\text{PO}_4)$  peak from time-resolved isothermal HT micro-Raman experiment at 358 K. Abbreviations: *n.o.* = not observed.

35

taranakite  $\nu_1(\text{PO}_4) - 358 \text{ K}$

| time | Wavenumber<br>( $\text{cm}^{-1}$ ) | $\sigma$<br>(Wavenumber)<br>( $\text{cm}^{-1}$ ) | FWHM<br>( $\text{cm}^{-1}$ ) | $\sigma$ (FWHM)<br>( $\text{cm}^{-1}$ ) | Integrated<br>Intensity (arb.u.) | $\sigma$ (Integrated<br>Intensity) (arb.u.) |
|------|------------------------------------|--------------------------------------------------|------------------------------|-----------------------------------------|----------------------------------|---------------------------------------------|
| 3    | 951.130                            | 0.339                                            | 29.151                       | 0.875                                   | 231.176                          | 5.234                                       |
| 8    | 951.130                            | *                                                | 28.693                       | 1.172                                   | 200.380                          | 12.769                                      |
| 13   | 951.130                            | *                                                | 30.279                       | 1.669                                   | 215.504                          | 15.892                                      |
| 18   | 951.130                            | *                                                | 29.296                       | 1.686                                   | 175.836                          | 10.698                                      |
| 23   | 951.130                            | *                                                | 30.444                       | 1.853                                   | 149.124                          | 9.686                                       |
| 28   | 951.130                            | *                                                | 33.116                       | 2.413                                   | 134.484                          | 10.737                                      |
| 33   | 951.130                            | *                                                | 32.995                       | 2.494                                   | 149.355                          | 11.420                                      |
| 38   | 951.130                            | *                                                | 33.314                       | 2.831                                   | 122.847                          | 10.995                                      |
| 43   | 951.130                            | *                                                | 39.002                       | 3.212                                   | 120.787                          | 10.946                                      |
| 48   | 951.130                            | *                                                | 36.479                       | 3.253                                   | 106.440                          | 10.256                                      |
| 53   | 951.130                            | *                                                | 39.206                       | 3.539                                   | 118.326                          | 11.338                                      |
| 58   | 951.130                            | *                                                | 38.458                       | 3.612                                   | 124.957                          | 11.891                                      |
| 63   | 951.130                            | *                                                | 45.405                       | 4.332                                   | 114.150                          | 11.714                                      |
| 68   | 951.130                            | *                                                | 43.971                       | 4.052                                   | 91.808                           | 9.808                                       |
| 73   | 951.130                            | *                                                | 42.287                       | 4.932                                   | 95.985                           | 11.688                                      |
| 78   | 951.130                            | *                                                | 44.160                       | 4.561                                   | 74.860                           | 9.473                                       |
| 83   | 951.130                            | *                                                | 42.615                       | 4.474                                   | 66.585                           | 8.632                                       |
| 88   | 951.130                            | *                                                | 48.750                       | 4.577                                   | 78.603                           | 9.191                                       |
| 93   | 951.130                            | *                                                | 43.169                       | 4.348                                   | 68.119                           | 8.104                                       |
| 98   | 951.130                            | *                                                | 46.277                       | 4.586                                   | 71.343                           | 8.860                                       |
| 103  | 951.130                            | *                                                | 49.709                       | 4.442                                   | 78.543                           | 8.672                                       |
| 108  | 951.130                            | *                                                | 51.305                       | 5.957                                   | 75.525                           | 11.184                                      |
| 115  | 951.130                            | *                                                | 47.758                       | 4.894                                   | 68.433                           | 8.540                                       |
| 120  | 951.130                            | *                                                | 46.703                       | 5.388                                   | 79.636                           | 10.521                                      |
| 125  | 951.130                            | *                                                | 50.269                       | 5.308                                   | 74.481                           | 9.409                                       |
| 130  | 951.130                            | *                                                | 48.705                       | 5.870                                   | 78.270                           | 10.848                                      |
| 135  | 951.130                            | *                                                | 52.403                       | 5.338                                   | 91.234                           | 10.553                                      |

|     |         |   |        |       |        |       |
|-----|---------|---|--------|-------|--------|-------|
| 140 | 951.130 | * | 53.609 | 4.955 | 79.031 | 8.924 |
| 145 | 951.130 | * | 52.410 | 5.331 | 74.802 | 9.329 |
| 150 | 951.130 | * | 54.184 | 5.338 | 75.174 | 8.917 |

**Table S6.** Raman data for taranakite  $\nu_1(\text{PO}_4)$  peak from time-resolved isothermal HT micro-Raman experiment at 358 K. Abbreviations: \* = parameter locked.

**francoanellite  $\nu_1(\text{PO}_4)$  – 363 K**

| time | Wavenumber<br>( $\text{cm}^{-1}$ ) | $\sigma$<br>(Wavenumber)<br>( $\text{cm}^{-1}$ ) | FWHM<br>( $\text{cm}^{-1}$ ) | $\sigma$ (FWHM)<br>( $\text{cm}^{-1}$ ) | Integrated<br>Intensity (arb.u.) | $\sigma$ (Integrated<br>Intensity) (arb.u.) |
|------|------------------------------------|--------------------------------------------------|------------------------------|-----------------------------------------|----------------------------------|---------------------------------------------|
| 3    | <i>n.o.</i>                        | <i>n.o.</i>                                      | <i>n.o.</i>                  | <i>n.o.</i>                             | <i>n.o.</i>                      | <i>n.o.</i>                                 |
| 8    | 938.934                            | 1.239                                            | 15.493                       | 2.977                                   | 50.790                           | 10.283                                      |
| 13   | 938.539                            | 0.733                                            | 14.970                       | 1.695                                   | 69.763                           | 8.100                                       |
| 18   | 938.417                            | 0.578                                            | 15.466                       | 1.490                                   | 98.137                           | 9.595                                       |
| 23   | 938.525                            | 0.507                                            | 16.669                       | 1.300                                   | 117.383                          | 9.820                                       |
| 28   | 938.070                            | 0.465                                            | 16.431                       | 1.258                                   | 127.847                          | 10.143                                      |
| 33   | 937.924                            | 0.418                                            | 15.979                       | 1.084                                   | 126.293                          | 8.801                                       |
| 38   | 937.680                            | 0.427                                            | 15.705                       | 1.050                                   | 123.363                          | 8.377                                       |
| 43   | 937.342                            | 0.455                                            | 16.946                       | 1.056                                   | 131.030                          | 8.685                                       |
| 49   | 937.489                            | 0.410                                            | 17.140                       | 1.006                                   | 129.667                          | 8.122                                       |
| 54   | 937.525                            | 0.380                                            | 16.248                       | 1.021                                   | 145.180                          | 9.355                                       |

**Table S7.** Raman data for francoanellite  $\nu_1(\text{PO}_4)$  peak from time-resolved isothermal HT micro-Raman experiment at 363 K. Abbreviations: *n.o.* = not observed.

40

**taranakite  $\nu_1(\text{PO}_4)$  – 363 K**

| time | Wavenumber<br>( $\text{cm}^{-1}$ ) | $\sigma$<br>(Wavenumber)<br>( $\text{cm}^{-1}$ ) | FWHM<br>( $\text{cm}^{-1}$ ) | $\sigma$ (FWHM)<br>( $\text{cm}^{-1}$ ) | Integrated<br>Intensity (arb.u.) | $\sigma$ (Integrated<br>Intensity) (arb.u.) |
|------|------------------------------------|--------------------------------------------------|------------------------------|-----------------------------------------|----------------------------------|---------------------------------------------|
| 3    | 951.863                            | 0.431                                            | 35.143                       | 1.124                                   | 242.244                          | 5.867                                       |
| 8    | 951.863                            | *                                                | 37.390                       | 2.308                                   | 194.825                          | 12.442                                      |
| 13   | 951.863                            | *                                                | 39.430                       | 2.806                                   | 156.489                          | 10.742                                      |
| 18   | 951.863                            | *                                                | 42.518                       | 3.397                                   | 124.875                          | 11.156                                      |
| 23   | 951.863                            | *                                                | 48.659                       | 5.120                                   | 120.879                          | 12.667                                      |
| 28   | 951.863                            | *                                                | 48.891                       | 5.246                                   | 111.430                          | 12.695                                      |

|    |         |   |        |       |         |        |
|----|---------|---|--------|-------|---------|--------|
| 33 | 951.863 | * | 49.702 | 5.384 | 110.003 | 11.785 |
| 38 | 951.863 | * | 45.068 | 5.211 | 100.248 | 11.328 |
| 43 | 951.863 | * | 43.949 | 5.752 | 107.708 | 12.450 |
| 49 | 951.863 | * | 52.083 | 6.214 | 99.018  | 11.215 |
| 54 | 951.863 | * | 56.663 | 9.258 | 101.293 | 14.120 |

**Table S8.** Raman data for taranakite  $\nu_1(\text{PO}_4)$  peak from time-resolved isothermal HT micro-Raman experiment at 363 K. Abbreviations: \* = parameter locked.

**francoanellite  $\nu_1(\text{PO}_4)$  – 373 K**

| time | Wavenumber<br>( $\text{cm}^{-1}$ ) | $\sigma$<br>(Wavenumber)<br>( $\text{cm}^{-1}$ ) | FWHM<br>( $\text{cm}^{-1}$ ) | $\sigma$ (FWHM)<br>( $\text{cm}^{-1}$ ) | Integrated<br>Intensity (arb.u.) | $\sigma$ (Integrated<br>Intensity) (arb.u.) |
|------|------------------------------------|--------------------------------------------------|------------------------------|-----------------------------------------|----------------------------------|---------------------------------------------|
| 3    | 934.485                            | 0.671                                            | 17.389                       | 2.135                                   | 135.412                          | 34.906                                      |
| 8    | 934.294                            | 0.426                                            | 15.894                       | 1.078                                   | 129.568                          | 8.735                                       |
| 13   | 934.484                            | 0.420                                            | 17.427                       | 1.069                                   | 158.506                          | 10.279                                      |
| 18   | 934.677                            | 0.365                                            | 16.611                       | 1.010                                   | 167.854                          | 10.098                                      |
| 23   | 934.493                            | 0.325                                            | 16.238                       | 0.945                                   | 166.344                          | 9.361                                       |
| 28   | 934.568                            | 0.301                                            | 16.788                       | 0.915                                   | 178.615                          | 9.547                                       |
| 33   | 934.352                            | 0.299                                            | 16.512                       | 0.860                                   | 181.297                          | 9.179                                       |
| 38   | 934.137                            | 0.301                                            | 16.560                       | 0.864                                   | 175.784                          | 8.921                                       |
| 43   | 934.265                            | 0.297                                            | 16.588                       | 0.895                                   | 186.997                          | 9.802                                       |
| 48   | 934.100                            | 0.299                                            | 17.155                       | 0.949                                   | 191.051                          | 10.378                                      |
| 53   | 934.137                            | 0.301                                            | 16.560                       | 0.864                                   | 175.784                          | 8.921                                       |

**Table S9.** Raman data for francoanellite  $\nu_1(\text{PO}_4)$  peak from time-resolved isothermal HT micro-Raman experiment at 373 K.

**taranakite  $\nu_1(\text{PO}_4)$  – 373 K**

| time | Wavenumber<br>( $\text{cm}^{-1}$ ) | $\sigma$<br>(Wavenumber)<br>( $\text{cm}^{-1}$ ) | FWHM<br>( $\text{cm}^{-1}$ ) | $\sigma$ (FWHM)<br>( $\text{cm}^{-1}$ ) | Integrated<br>Intensity (arb.u.) | $\sigma$ (Integrated<br>Intensity) (arb.u.) |
|------|------------------------------------|--------------------------------------------------|------------------------------|-----------------------------------------|----------------------------------|---------------------------------------------|
| 3    | 950.020                            | 3.284                                            | 33.356                       | 5.898                                   | 138.318                          | 41.199                                      |
| 8    | 950.020                            | *                                                | 37.010                       | 3.901                                   | 119.668                          | 12.099                                      |
| 13   | 950.020                            | *                                                | 32.450                       | 5.437                                   | 76.979                           | 13.014                                      |
| 18   | 950.020                            | *                                                | 49.959                       | 7.905                                   | 62.173                           | 11.501                                      |

|    |         |   |        |        |        |        |
|----|---------|---|--------|--------|--------|--------|
| 23 | 950.020 | * | 55.420 | 6.507  | 68.058 | 9.971  |
| 28 | 950.020 | * | 61.764 | 7.591  | 64.632 | 10.080 |
| 33 | 950.020 | * | 55.203 | 7.685  | 54.112 | 9.525  |
| 38 | 950.020 | * | 59.692 | 8.452  | 58.420 | 9.947  |
| 43 | 950.020 | * | 60.947 | 10.499 | 52.133 | 12.060 |
| 48 | 950.020 | * | 70.182 | 12.271 | 57.485 | 14.010 |
| 53 | 950.020 | * | 59.692 | 8.452  | 58.420 | 9.947  |

45 **Table S10.** Raman data for taranakite  $\nu_1(\text{PO}_4)$  peak from time-resolved isothermal HT micro-Raman experiment at 373 K. Abbreviations: \* = parameter locked.

## S5. References

Kuzmany, H.: Solid-State Spectroscopy: An Introduction, Springer-Verlag Berlin, Heidelberg, Germany, 554 pp., doi:10.1007/978-3-642-01479-6, 2009.
